# Supplementary material for: Heterogeneity of TPIT expression in ACTH-secreting extra-pituitary neuroendocrine tumors (NETs) supports the existence of different cellular programs in pancreatic and pulmonary NETs
Source: Research Square preprint supplement (doi:10.21203/rs.3.rs-2334000/v1), 2022-12-07
Supplement: Supplementary file 1 [file 25a0d0ad67dffb05e5293eac.xlsx]

## Sheet: Foglio1
	TPIT	B2M	dCT	ddCT	relative expression		As compared to controls
LU01	36.4404	31.3662	5.07422	1.825	0.28224		0.0358979
LU02	30.3641	26.8183	3.54577	0.296546	0.814199		0.103557
LU03	36.8316	29.9182	6.91339	3.66417	0.0788815		0.0100329
LU04	38.6112	24.8758	13.7354	10.4862	0.000697164		8.86717e-05
LU05	29.9824	25.9201	4.06227	0.813054	0.569176		0.072393
LU06	44.2948	30.168	14.1268	10.8775	0.000531542		6.76064e-05
LU07	29.3776	24.3451	5.03245	1.78323	0.290533		0.0369527
LU08	29.5221	26.2273	3.2948	0.0455788	0.968901		0.123234
LU09	33.0673	27.2655	5.80183	2.55261	0.170446		0.0216789
LU10	30.251	25.7045	4.54646	1.29724	0.406904		0.0517539
LU11	34.1562	28.5855	5.57071	2.32149	0.200061		0.0254456
LU12	30.2896	25.814	4.47554	1.22632	0.427406		0.0543614
LU13	33.312	25.6112	7.70071	4.45149	0.0457054		0.00581323
LU14	nv	nv	nv	nv	nv		nv
LU15	30.5692	25.5696	4.99952	1.7503	0.29724		0.0378057
LU16	32.3623	27.525	4.83737	1.58815	0.332597		0.0423028
LU17	31.0024	26.5209	4.48152	1.2323	0.425639		0.0541367
LU18	33.3182	28.7367	4.58152	1.3323	0.397134		0.0505111
LU19	31.6653	27.5432	4.12208	0.872857	0.546064		0.0694535
LU20	38.5568	33.3611	5.19572	1.9465	0.259444		0.0329985
LU21	31.3097	26.5292	4.7805	1.53128	0.34597		0.0440036
LU22	32.5904	27.9456	4.64478	1.39555	0.380099		0.0483445
LU23	33.1667	28.1112	5.05548	1.80626	0.285931		0.0363674
LU24	29.8538	25.954	3.89976	0.650538	0.637043		0.081025
LU25	34.1524	22.8464	11.306	8.05674	0.00375559		0.000477671
LU26	32.0216	26.8395	5.18215	1.93293	0.261897		0.0333105
LU27	32.2713	25.4723	6.79897	3.54975	0.0853923		0.010861
LU28	38.2498	31.7472	6.50259	3.25337	0.104867		0.0133379
LU29	29.09	24.0031	5.08687	1.83765	0.279778		0.0355847
LU30	35.0337	26.5922	8.44144	5.19222	0.0273518		0.00347885
LU31	38.655	32.8469	5.80804	2.55882	0.169715		0.0215859
LU32	28.2117	23.4714	4.74032	1.4911	0.35574		0.0452464
PA1	38.6043	31.0735	7.53078	4.28156	0.0514188		0.00653992
PA2	40.0208	31.491	8.52984	5.28062	0.0257262		0.0032721
PA3	35.7553	24.4697	11.2856	8.03635	0.00380907		0.000484473
PA4	33.296	22.981	10.315	7.06577	0.00746432		0.000949381
PA5	38.5977	26.6118	11.9859	8.73666	0.00234424		0.000298162
PA6	38.1976	26.4819	11.7158	8.46653	0.00282696		0.000359559
PA7	37.9345	27.9147	10.0198	6.77061	0.00915889		0.00116491
PA8	32.7507	24.0505	8.70016	5.45094	0.0228615		0.00290774
PHEO1	37.3222	28.5392	8.78302	5.5338	0.0215854		0.00274543
PHEO2	29.09	24.0031	5.08687	1.83765	0.279778		0.0355847
PI1	26.4076	26.0733	0.334337	-2.91488	7.54167		0.959219
PI2	26.2444	25.8032	0.441196	-2.80802	7.00325		0.890738
PI3	24.9289	26.3068	-1.37787	-4.62709	24.7112		3.143
PI4	38.3462	29.9841	8.36213	5.1129	0.0288976		0.00367547
PI5	33.4308	24.9445	8.48632	5.2371	0.0265141		0.00337231
